# Supplementary material for: Mitochondrial function remains impaired in the hypertrophied right ventricle of pulmonary hypertensive rats following short duration metoprolol treatment
Source: PubMed Central journal article supplement (PMC6456253; doi:10.1371/journal.pone.0214740), 2019-04-09
Supplement: pone.0214740.s007.pdf [file pone.0214740.s007.pdf]

| Animal      | CI + CII OXPHOS<br>(ADP) (pmols s <sup>-1</sup><br>mg <sup>-1</sup> ) | CI / CI + CII<br>OXPHOS (ADP) | CI + CII ADP-limited<br>OXPHOS (ATP) (pmols s <sup>-1</sup><br>mg <sup>-1</sup> ) |
|-------------|-----------------------------------------------------------------------|-------------------------------|-----------------------------------------------------------------------------------|
| CON9        | 240.7                                                                 | 0.435                         | 196.5                                                                             |
| CON10       | 200.5                                                                 | 0.627                         | 228.6                                                                             |
| CON13       | 235.2                                                                 | 0.424                         | 177.9                                                                             |
| CON12       | 255.9                                                                 | 0.724                         | 220.9                                                                             |
| CON11       | 206.5                                                                 | 0.448                         | 189.5                                                                             |
| CON14       | 256.3                                                                 | 0.370                         | 231.4                                                                             |
| <b>Mean</b> | <b>232.5</b>                                                          | <b>0.505</b>                  | <b>207.4</b>                                                                      |
| <b>SEM</b>  | <b>9.8</b>                                                            | <b>0.057</b>                  | <b>9.2</b>                                                                        |
|             |                                                                       |                               |                                                                                   |
| MCT10       | 186.0                                                                 | 0.356                         | 275.1                                                                             |
| MCT9        | 150.3                                                                 | 0.377                         | 172.0                                                                             |
| MCT12       | 192.0                                                                 | 0.343                         | 205.3                                                                             |
| MCT15       | 216.0                                                                 | 0.271                         | 124.2                                                                             |
| MCT14       | 211.3                                                                 | 0.353                         | 214.0                                                                             |
| <b>Mean</b> | <b>191.1</b>                                                          | <b>0.340</b>                  | <b>198.1</b>                                                                      |
| <b>SEM</b>  | <b>11.7</b>                                                           | <b>0.018</b>                  | <b>24.9</b>                                                                       |
|             |                                                                       |                               |                                                                                   |
| MCT + BB 1  | 189.2                                                                 | 0.252                         | 158.5                                                                             |
| MCT + BB 3  | 127.5                                                                 | 0.298                         | 129.9                                                                             |
| MCT + BB 2  | 213.0                                                                 | 0.467                         | 145.6                                                                             |
| MCT + BB 6  | 171.9                                                                 | 0.364                         | 133.8                                                                             |
| MCT + BB 5  | 199.7                                                                 | 0.377                         | 159.6                                                                             |
| MCT + BB 4  | 195.8                                                                 | 0.367                         | 119.1                                                                             |
| <b>Mean</b> | <b>182.9</b>                                                          | <b>0.354</b>                  | <b>141.1</b>                                                                      |
| <b>SEM</b>  | <b>12.4</b>                                                           | <b>0.030</b>                  | <b>6.7</b>                                                                        |

| CI / CI + CII ADP-limited OXPHOS (ATP) | ET (pmols s <sup>-1</sup> mg <sup>-1</sup> ) |
|----------------------------------------|----------------------------------------------|
| 0.578                                  | 308.7                                        |
| 0.620                                  | 210.9                                        |
| 0.620                                  | 288.5                                        |
| 0.613                                  | 305.5                                        |
| 0.569                                  | 317.6                                        |
| 0.567                                  | 332.3                                        |
| <b>0.594</b>                           | 293.9                                        |
| <b>0.011</b>                           | 17.6                                         |
|                                        |                                              |
| 0.596                                  |                                              |
| 0.451                                  | 172.4                                        |
| 0.525                                  | 280.1                                        |
| 0.581                                  | 208.3                                        |
| 0.456                                  | 309.2                                        |
| <b>0.522</b>                           | <b>242.5</b>                                 |
| <b>0.030</b>                           | <b>31.6</b>                                  |
|                                        |                                              |
| 0.527                                  | 219.0                                        |
| 0.498                                  | 153.5                                        |
| 0.491                                  | 261.1                                        |
| 0.617                                  | 159.5                                        |
| 0.538                                  | 225.6                                        |
| 0.596                                  | 178.4                                        |
| <b>0.544</b>                           | <b>199.5</b>                                 |
| <b>0.021</b>                           | <b>17.3</b>                                  |
